# Supplementary material for: Carbohydrate recognition and photodegradation by an anthracene–Kemp's acid hybrid
Source: Royal Society of Chemistry journal article supplement (doi:10.1039/c2ob26417j), 2012-01-01
Supplement: c2ob26417j.pdf [file c2ob26417j.pdf]

**SUPPLEMENTARY INFORMATION**

**Carbohydrate Recognition and Photodegradation by an  
Anthracene-Kemp's Acid Hybrid**

Miyuki Nishibu, Daisuke Takahashi, and Kazunobu Toshima\*

*Department of Applied Chemistry, Faculty of Science and Technology,  
Keio University, 3-14-1 Hiyoshi, Kohoku-ku, Yokohama 223-8522 (Japan)*

*Fax: (+81)45-566-1576,*

*E-mail: toshima@aplc.keio.ac.jp*

| <b>Contents</b>                                                                                       | <b>Page</b> |
|-------------------------------------------------------------------------------------------------------|-------------|
| <sup>1</sup> H-NMR binding assay.                                                                     | 2           |
| Photodegradation of β-CD by anthracene derivative <b>8</b> .                                          | 4           |
| Photodegradation of monosaccharides <b>3</b> and <b>4</b> by anthracene-Kemp's acid hybrid <b>1</b> . | 4           |
| EPR spectrometry.                                                                                     | 5           |
| References.                                                                                           | 5           |

### <sup>1</sup>H-NMR binding assay.

All <sup>1</sup>H-NMR measurements were performed on a JEOL ECA-500. The sample temperature was regulated at 298 K. For <sup>1</sup>H-NMR binding assay, a 2 mM solution of anthracene-Kemp's acid hybrid **1** in CDCl<sub>3</sub> (solution A) and 100 mM solution of each substrate in CDCl<sub>3</sub> (solution B) were prepared. And then, solution B was titrated into a solution A in order to make mixtures with a constant concentration of the hybrid and a range of concentration of each substrate (0.3 - 30 eq.). In general, ten different concentrations were made.  $\Delta\delta_{\text{obs}}$  was plotted against the concentration of a substrate, where  $\Delta\delta_{\text{obs}}$  is the difference between the observed <sup>1</sup>H-NMR chemical shift of the imide NH proton of **1** and the <sup>1</sup>H-NMR chemical shift of the free imide NH proton of **1**. The titration data were analyzed by nonlinear least-square method using Microsoft Excel 2010 software.<sup>1,2</sup>

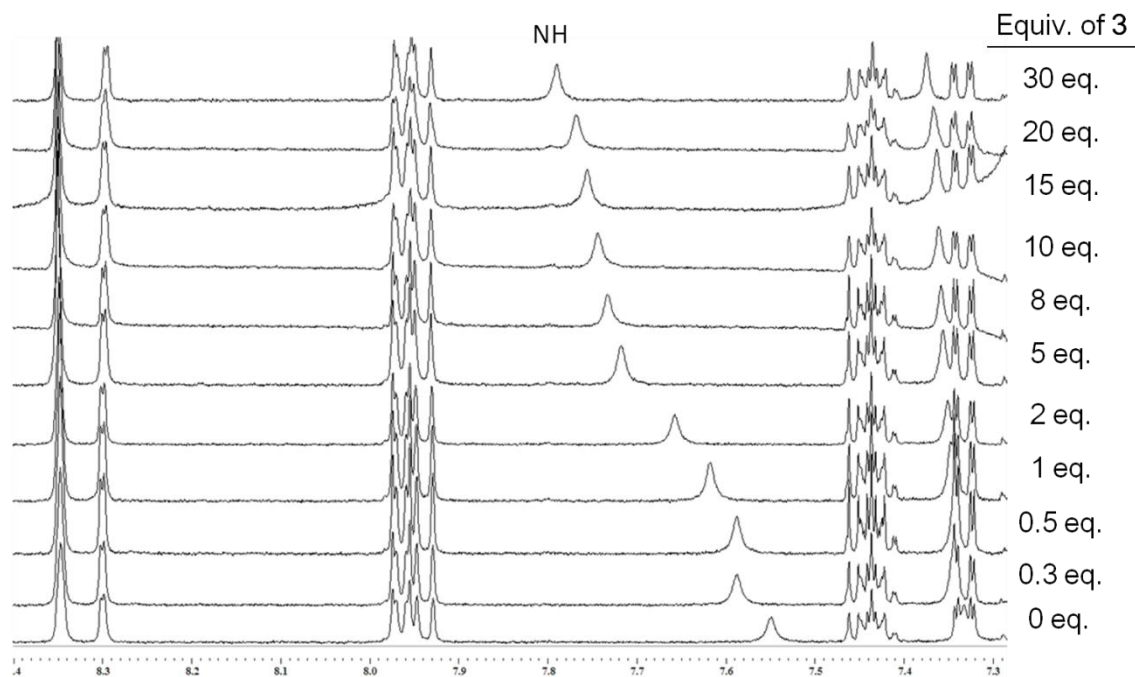

**Figure S1** Partial <sup>1</sup>H-NMR spectra (500 MHz, CDCl<sub>3</sub>, 298 K) of receptor **1** (1.0 mM) after addition of (from bottom to top) 0.0-30.0 equiv. of **3**.

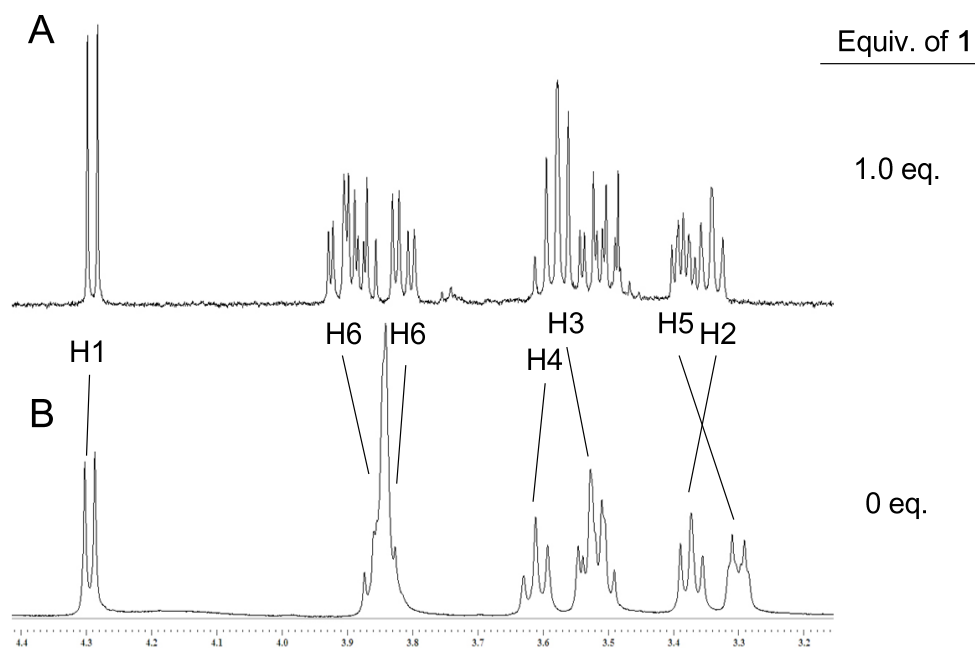

**Figure S2** Partial <sup>1</sup>H-NMR spectra (500 MHz, CDCl<sub>3</sub>, 298 K) of **3** (B) and upon addition of 1 mM of **1** (A).

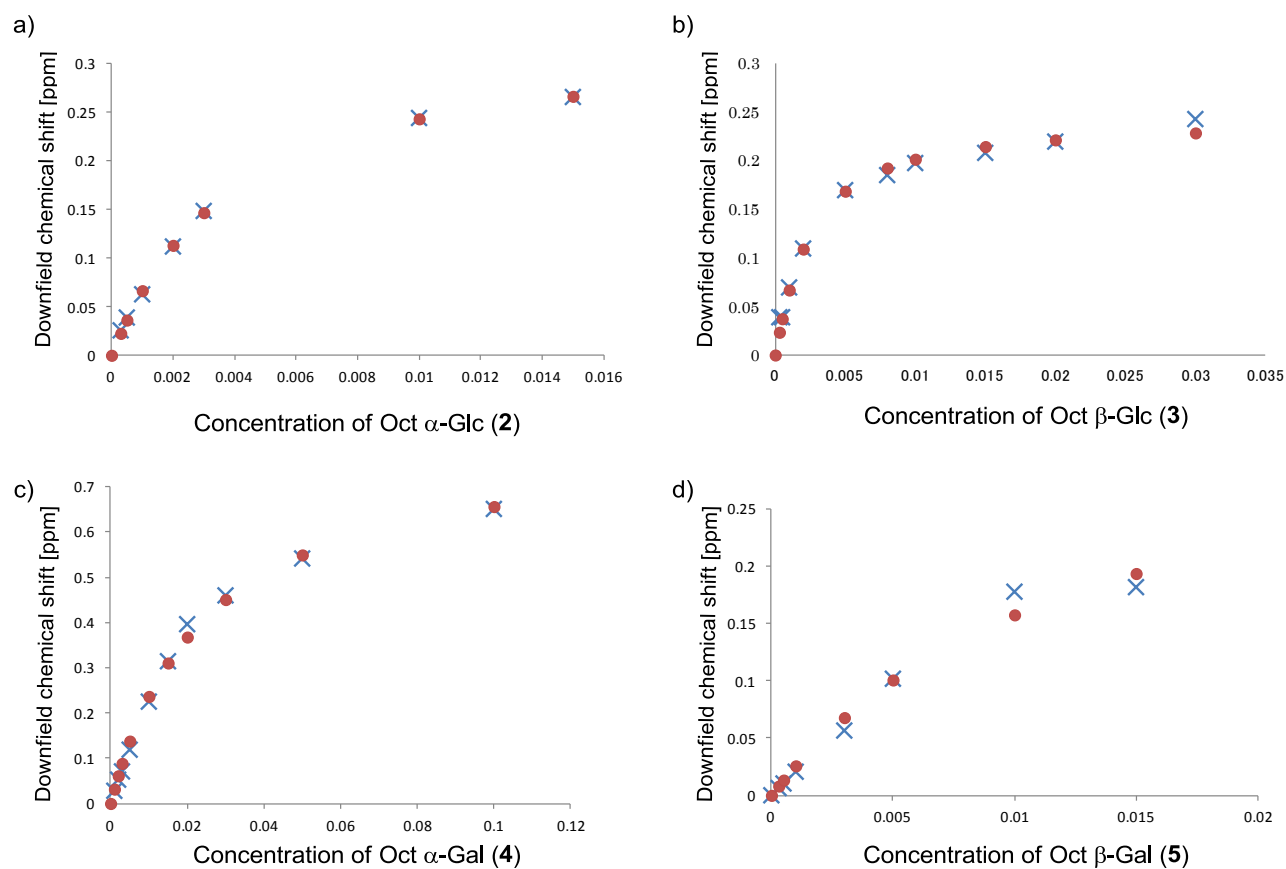

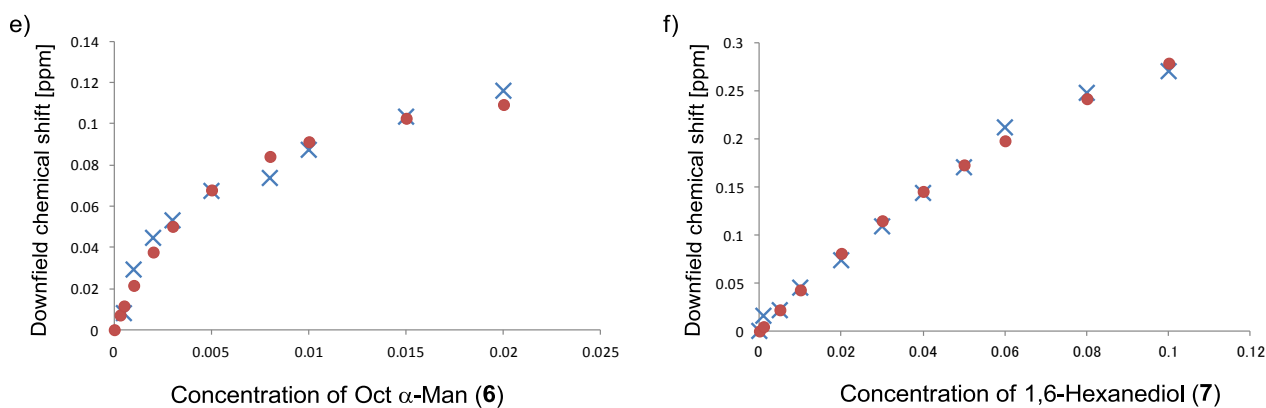

**Figure S3** Plot of the observed (X) and calculated (●) downfield chemical shifts of the imide NH signal of **1** as a function of added each monosaccharide in CDCl<sub>3</sub> at 500 MHz and T=298 K. (a) Oct  $\alpha$ -Glc (**2**), (b) Oct  $\beta$ -Glc (**3**), (c) Oct  $\alpha$ -Gal (**4**), (d) Oct  $\beta$ -Gal (**5**), (e) Oct  $\alpha$ -Man (**6**), and (f) 1,6-Hexanediol (**7**).

#### Photodegradation of $\beta$ -CD by anthracene derivative **8**.

$\beta$ -CD (30  $\mu$ M) was incubated with an anthracene derivative **8** (0, 90 or 300  $\mu$ M) in 1% DMSO/MeCN-H<sub>2</sub>O (9:1) at 25 °C for 2 h under irradiation with a UV lamp (365 nm, 100 W, Black-ray (B-100A), UVP Inc.,) placed 10 cm from the vessels, and analyzed by HPLC (TSK-GEL, Amide-80, 4.6 $\times$ 150 mm; 40 °C; detection by RI).

#### Photodegradation of monosaccharides **3** and **4** by anthracene-Kemp's acid hybrid **1**.

Each monosaccharide (1.0 mM) was incubated with anthracene-Kemp's acid hybrid **1** (1.0 mM) in 1% DMSO/MeCN at 25 °C for 2 h under photo-irradiation (365 nm, 100 W) placed 10 cm from the mixture) and the mixture was dried *in vacuo*. The residue was acetylated using Ac<sub>2</sub>O in pyridine at 40 °C for 13 h, and then concentrated. The resulting residue was subjected to silica gel column chromatography and analyzed by HPLC (Mightysil RP-18 GP 5 mM, 4.6 $\times$ 150 mm; 40 °C; detection by UV (215 nm); 35:65 MeCN/H<sub>2</sub>O; flow rate 1.0 mL min<sup>-1</sup>).

## EPR spectrometry.

EPR experiments were carried out with a E-500 CW/EPR (Bruker) and recorded under the following conditions: microwave frequency 9.39 GHz, microwave power 16 mW, field modulation 0.1 mT at 100 kHz. DMPO was used as a spin-trapping agent. Anthracene derivative **8** (100  $\mu$ M) and DMPO (500 mM) were incubated in 20% MeCN/H<sub>2</sub>O under irradiation with a UV lamp (365 nm, 100 W) placed 40 cm from a flat cell for 40 min.

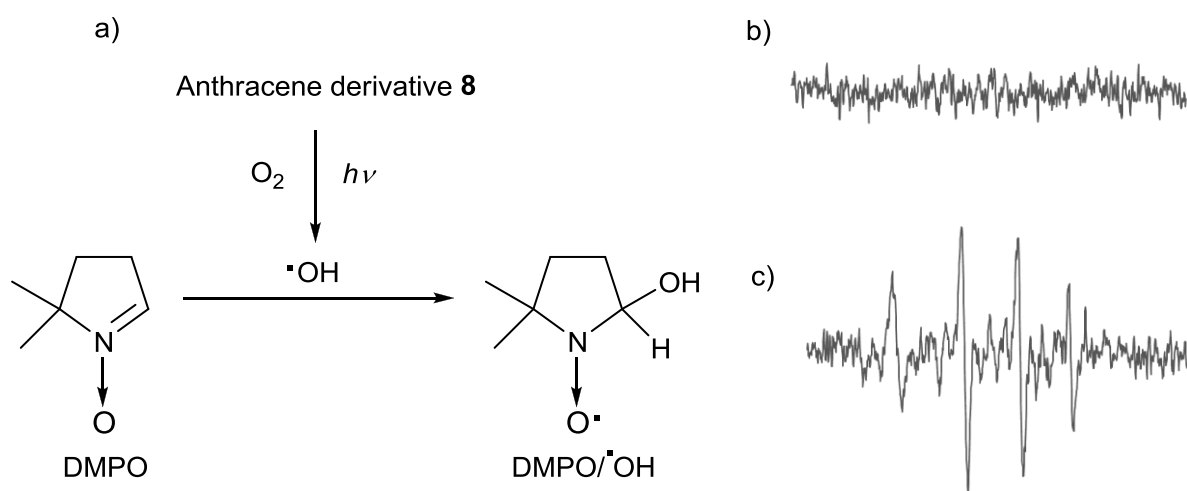

**Figure S4** EPR spectra obtained during photo-irradiation of **8** in the presence of DMPO. **8** (100  $\mu$ M) was incubated with DMPO (500 mM) in 20% MeCN/H<sub>2</sub>O under irradiation with a UV lamp (365 nm, 100 W) placed 40 cm from a flat cell for 40 min. a) Formation of DMPO/ $\cdot OH$  from DMPO by reaction of photo-excited **8** and O<sub>2</sub>. b) Before irradiation; c) after 40 min irradiation.

## References.

- 1 B. Askew, P. Ballester, C. Buhr, K. S. Jeong, S. Jones, K. Parris, K. Williams and J. Rebek Jr., *J. Am. Chem. Soc.*, 1989, **111**, 1082; K. Williams, B. Askew, P. Ballester, C. Buhr, K. D. Jeong, S. Jones and J. Rebek Jr., *J. Am. Chem. Soc.*, 1989, **111**, 1090.
- 2 N. Hayashi, T. Ujihara and K. Kohata, *Biosci. Biotechnol. Biochem.*, 2004, **68**, 2512; K. Hirose, *J. Incl. Phenom. Macro.*, 2001, **39**, 193.
